# Supplementary material for: Utilization of double-sensitized structure toward achieving high performance green and red phosphorescent organic light-emitting diodes
Source: Royal Society of Chemistry journal article supplement (doi:10.1039/d1tc02756e), 2021-01-01

## Supporting Information (SI)

**Utilization of double-sensitized structure toward achieving high performance  
green and red phosphorescent organic light-emitting diodes**

Shuaibing Li <sup>a,b</sup>, Ruixia Wu <sup>a</sup>, Kai Chen <sup>a</sup>, Weidong Sun <sup>a</sup>, Zhenzhen Li <sup>a</sup> and Liang  
Zhou <sup>a,b,\*</sup>

*<sup>a</sup> State Key Laboratory of Rare Earth Resource Utilization, Changchun Institute of  
Applied Chemistry, Chinese Academy of Sciences, Changchun 130022, People's  
Republic of China*

*<sup>b</sup> University of Science and Technology of China, Hefei 230027, People's Republic of  
China*

**Table S1.** The key properties of green single-EML devices with Ir(mppy)<sub>3</sub> at different doping concentrations.

| Device | V <sub>turn-on</sub><br>(V) | B <sup>a</sup><br>(cd m <sup>-2</sup> ) | η <sub>c</sub> <sup>b</sup> (EQE <sup>c</sup> )<br>(cd A <sup>-1</sup> ) | η <sub>p</sub> <sup>d</sup><br>(lm W <sup>-1</sup> ) | η <sub>c</sub> <sup>e</sup> (cd A <sup>-1</sup> ) (EQE <sup>f</sup> )<br>(1000 cdm <sup>-2</sup> ) | CIE <sub>x,y</sub> <sup>g</sup> |
|--------|-----------------------------|-----------------------------------------|--------------------------------------------------------------------------|------------------------------------------------------|----------------------------------------------------------------------------------------------------|---------------------------------|
| 6 wt%  | 2.5                         | 45313                                   | 74.99 (23.1%)                                                            | 78.49                                                | 51.64 (15.6%)                                                                                      | (0.267, 0.629)                  |
| 8 wt%  | 2.7                         | 43119                                   | 76.12 (23.8%)                                                            | 75.36                                                | 44.04 (13.3%)                                                                                      | (0.271, 0.627)                  |
| 10 wt% | 2.6                         | 55458                                   | 81.59 (25.1%)                                                            | 87.94                                                | 58.52 (13.8%)                                                                                      | (0.278, 0.624)                  |
| 12 wt% | 2.7                         | 58394                                   | 80.78 (24.7%)                                                            | 84.33                                                | 70.01 (21.0%)                                                                                      | (0.281, 0.625)                  |
| 14 wt% | 2.6                         | 59660                                   | 77.45 (23.6%)                                                            | 86.86                                                | 69.79 (21.0%)                                                                                      | (0.286, 0.622)                  |
| 16 wt% | 2.6                         | 66268                                   | 71.14 (21.5%)                                                            | 75.50                                                | 67.31 (20.2%)                                                                                      | (0.290, 0.621)                  |

<sup>a</sup> The data for maximum brightness (B), <sup>b</sup> maximum current efficiency (η<sub>c</sub>), <sup>c</sup> maximum external quantum efficiency (EQE), <sup>d</sup> maximum power efficiency (η<sub>p</sub>), <sup>e</sup> current efficiency (η<sub>c</sub>) at the practical brightness of 1000 cd m<sup>-2</sup>, <sup>f</sup> external quantum efficiency (EQE) at the practical brightness of 1000 cd m<sup>-2</sup>, <sup>g</sup> Commission Internationale de l'Eclairage coordinates (CIE<sub>x,y</sub>) at 10 mA cm<sup>-2</sup>.

**Figure S1 (a)** EL efficiency-current density ( $\eta$ - $J$ ) characteristics of green single-EML devices with Ir(mppy)<sub>3</sub> at different doping concentrations. Inset: Current density-brightness-voltage ( $J$ - $B$ - $V$ ) characteristics of green single-EML devices with Ir(mppy)<sub>3</sub> at different doping concentrations. **(b)** Normalized EL spectra of green single-EML devices with Ir(mppy)<sub>3</sub> at different doping concentrations operating at 10 mA cm<sup>-2</sup>.

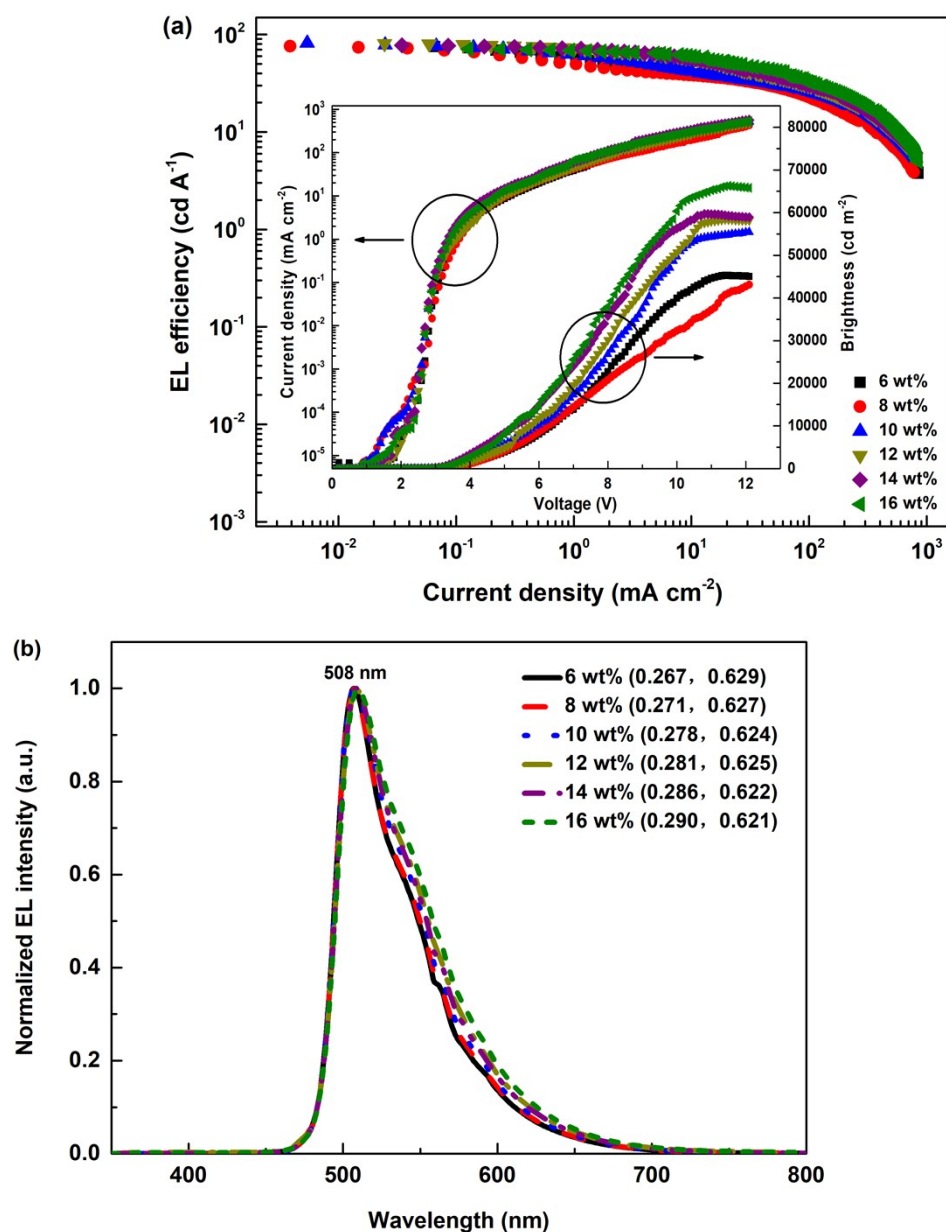

**Table S2.** The key properties of green single-EML devices with FK306 at different co-doping concentrations in EML.

| Device  | $V_{\text{turn-on}}$<br>(V) | $B^a$<br>( $\text{cd m}^{-2}$ ) | $\eta_c^b$ (EQE <sup>c</sup> )<br>( $\text{cd A}^{-1}$ ) | $\eta_p^d$<br>( $\text{lm W}^{-1}$ ) | $\eta_c^e$ ( $\text{cd A}^{-1}$ ) (EQE <sup>f</sup> )<br>(1000 $\text{cd m}^{-2}$ ) | $\text{CIE}_{x,y}^g$ |
|---------|-----------------------------|---------------------------------|----------------------------------------------------------|--------------------------------------|-------------------------------------------------------------------------------------|----------------------|
| 0.2 wt% | 2.7                         | 50626                           | 74.64 (23.1%)                                            | 74.42                                | 51.67 (15.5%)                                                                       | (0.276, 0.626)       |
| 0.4wt%  | 2.6                         | 73787                           | 75.21 (22.9%)                                            | 74.69                                | 55.38 (16.7%)                                                                       | (0.269, 0.628)       |
| 0.6 wt% | 2.7                         | 60783                           | 80.65 (24.7%)                                            | 76.49                                | 51.55 (15.5%)                                                                       | (0.275, 0.625)       |
| 0.8 wt% | 2.5                         | 57155                           | 78.87 (23.8%)                                            | 79.82                                | 54.41 (16.4%)                                                                       | (0.272, 0.627)       |
| 1 wt%   | 2.7                         | 49014                           | 77.56 (24.1%)                                            | 70.92                                | 53.43 (16.1%)                                                                       | (0.271, 0.627)       |

<sup>a</sup> The data for maximum brightness (B), <sup>b</sup> maximum current efficiency ( $\eta_c$ ), <sup>c</sup> maximum external quantum efficiency (EQE), <sup>d</sup> maximum power efficiency ( $\eta_p$ ), <sup>e</sup> current efficiency ( $\eta_c$ ) at the practical brightness of 1000  $\text{cd m}^{-2}$ , <sup>f</sup> external quantum efficiency (EQE) at the practical brightness of 1000  $\text{cd m}^{-2}$ , <sup>g</sup> Commission Internationale de l'Eclairage coordinates ( $\text{CIE}_{x,y}$ ) at 10  $\text{mA cm}^{-2}$ .

**Fig. S2 (a)** EL efficiency-current density ( $\eta$ - $J$ ) characteristics of green single-EML devices with FK306 at different co-doping concentrations in EML. Inset: Current density-brightness-voltage ( $J$ - $B$ - $V$ ) characteristics of green single-EML devices with FK306 at different co-doping concentrations in EML. **(b)** Normalized EL spectra of green single-EML devices with FK306 at different co-doping concentrations in EML operating at 10 mA cm<sup>-2</sup>.

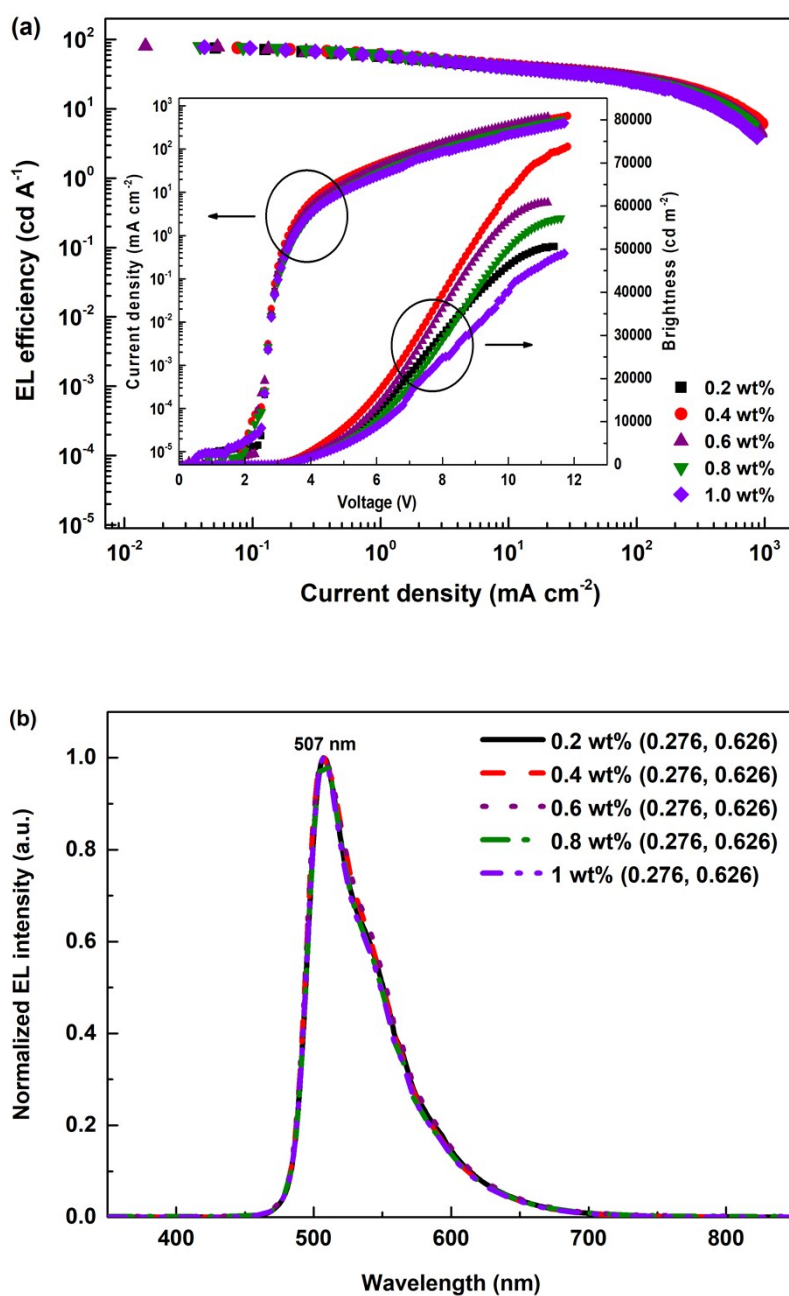

**Table S3.** The key properties of green single-EML sensitized devices with FK306 at different doping concentrations in ETL.

| Device  | $V_{\text{turn-on}}$<br>(V) | $B^a$<br>( $\text{cd m}^{-2}$ ) | $\eta_c^b$ (EQE <sup>c</sup> )<br>( $\text{cd A}^{-1}$ ) | $\eta_p^d$<br>( $\text{lm W}^{-1}$ ) | $\eta_c^e$ ( $\text{cd A}^{-1}$ ) (EQE <sup>f</sup> )<br>(1000 $\text{cd m}^{-2}$ ) | $\text{CIE}_{x,y}^g$ |
|---------|-----------------------------|---------------------------------|----------------------------------------------------------|--------------------------------------|-------------------------------------------------------------------------------------|----------------------|
| 0.8 wt% | 2.7                         | 56351                           | 76.90 (23.7%)                                            | 79.51                                | 59.68 (18.0%)                                                                       | (0.269, 0.628)       |
| 1 wt%   | 2.5                         | 67862                           | 78.29 (23.9%)                                            | 80.81                                | 60.34 (18.2%)                                                                       | (0.277, 0.624)       |
| 2 wt%   | 2.5                         | 70215                           | 86.67 (26.2%)                                            | 87.50                                | 68.02 (20.5%)                                                                       | (0.272, 0.628)       |
| 3 wt%   | 2.5                         | 62850                           | 79.65 (24.3%)                                            | 74.29                                | 63.52 (19.1%)                                                                       | (0.277, 0.624)       |
| 4 wt%   | 2.7                         | 59753                           | 76.44 (23.5%)                                            | 80.67                                | 62.55 (18.9%)                                                                       | (0.275, 0.625)       |
| 5 wt%   | 2.7                         | 49652                           | 74.65 (23.0%)                                            | 72.31                                | 57.86(17.4%)                                                                        | (0.268, 0.627)       |

<sup>a</sup> The data for maximum brightness (B), <sup>b</sup> maximum current efficiency ( $\eta_c$ ), <sup>c</sup> maximum external quantum efficiency (EQE), <sup>d</sup> maximum power efficiency ( $\eta_p$ ), <sup>e</sup> current efficiency ( $\eta_c$ ) at the practical brightness of 1000  $\text{cd m}^{-2}$ , <sup>f</sup> external quantum efficiency (EQE) at the practical brightness of 1000  $\text{cd m}^{-2}$ , <sup>g</sup> Commission Internationale de l'Eclairage coordinates ( $\text{CIE}_{x,y}$ ) at 10  $\text{mA cm}^{-2}$ .

**Fig. S3 (a)** EL efficiency-current density ( $\eta$ - $J$ ) characteristics of green single-EML sensitized devices with FK306 at different doping concentrations in ETL. Inset: Current density-brightness-voltage ( $J$ - $B$ - $V$ ) characteristics of green single-EML sensitized devices with FK306 at different doping concentrations in ETL. **(b)** Normalized EL spectra of green single-EML sensitized devices with FK306 at different doping concentrations in ETL operating at  $10 \text{ mA cm}^{-2}$ .

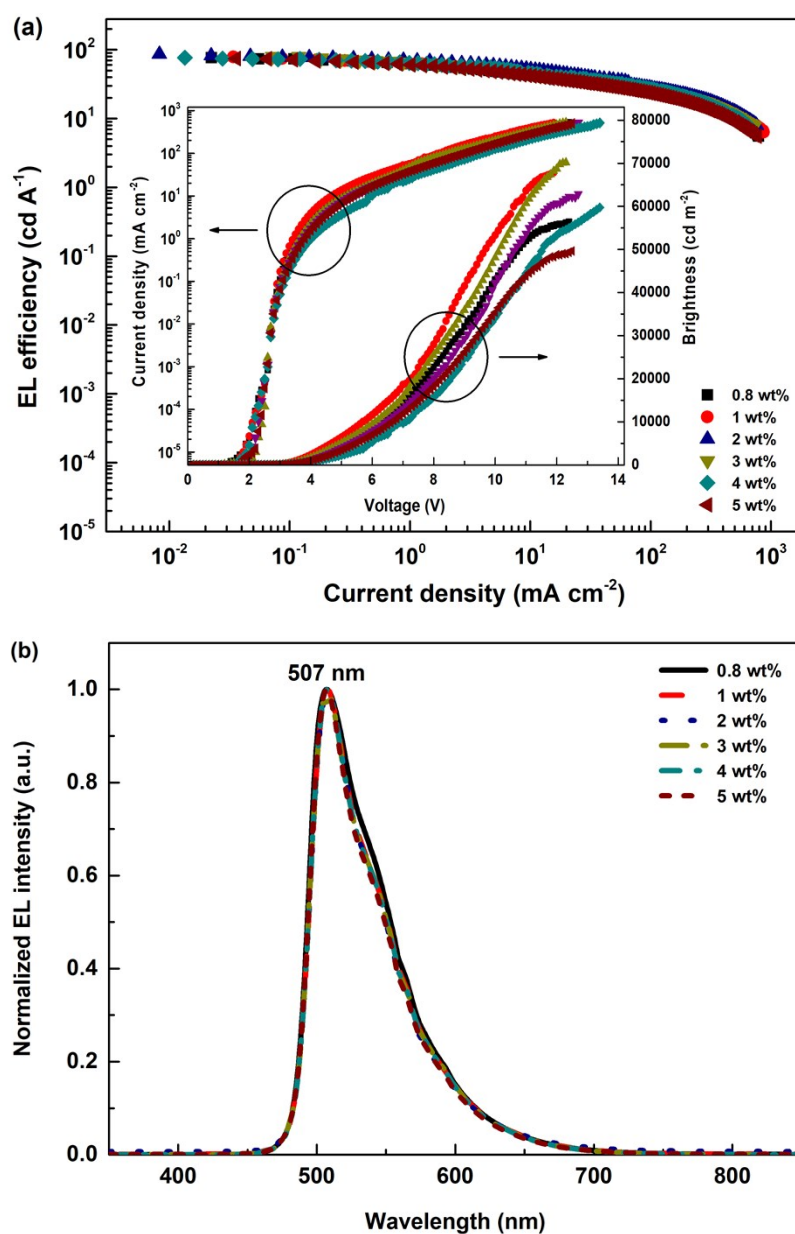

**Figure S4** Proposed energy levels diagram of the designed red OLEDs in this work

and the molecular structure of Ir(piq)<sub>3</sub>.

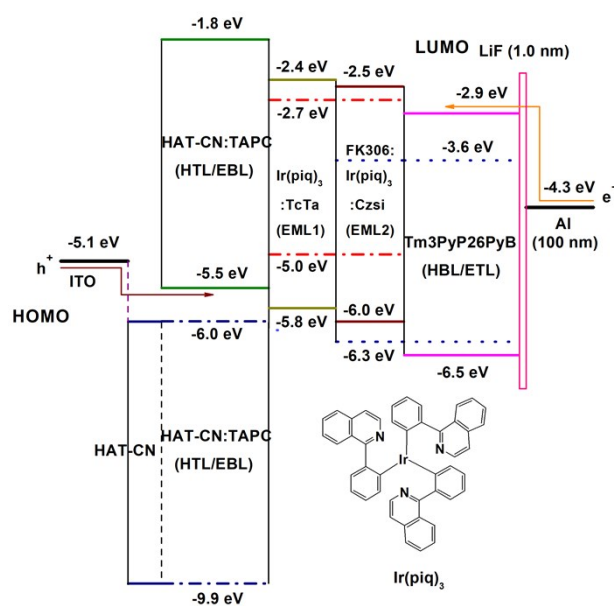

**Fig. S5.** Transient EL decay curves of device A and C.

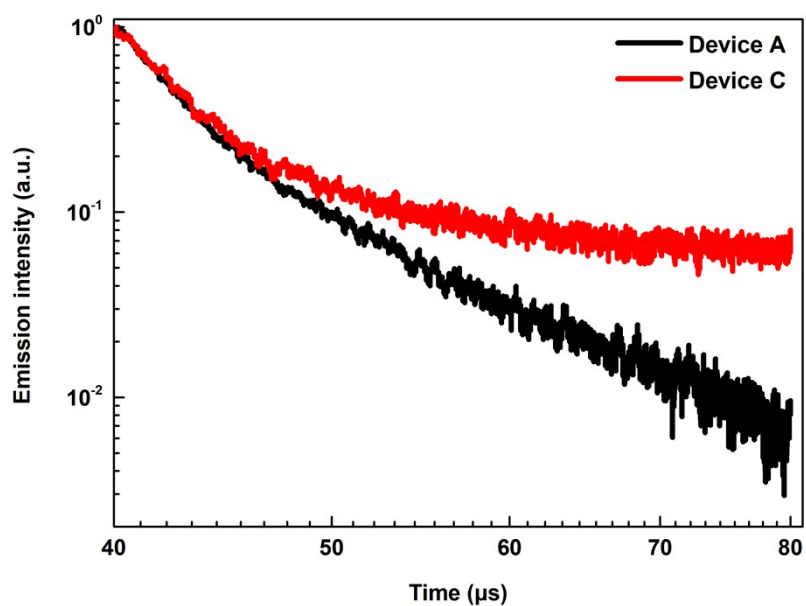

Supplement: d1tc02756e1.pdf [file d1tc02756e1.pdf]
